# Supplementary material for: Multiple sclerosis retrovirus-like envelope gene: Role of the chromosome 20 insertion
Source: PubMed Central journal article supplement — BBA Clin. 2015 Feb 19;3:162–7. doi: 10.1016/j.bbacli.2015.02.002 (PMC4669942; doi:10.1016/j.bbacli.2015.02.002), 2015-02-19
Supplement: mmc3.pdf [file mmc3.pdf]

To view the full contents of this document, you need a later version of the PDF viewer. You can upgrade to the latest version of Adobe Reader from [www.adobe.com/products/acrobat/readstep2.html](http://www.adobe.com/products/acrobat/readstep2.html)

For further support, go to [www.adobe.com/support/products/acrreader.html](http://www.adobe.com/support/products/acrreader.html)
